# Supplementary material for: Investigation of 8-Aza-7-Deaza Purine Nucleoside Derivatives
Source: MDPI journal article supplement (doi:10.3390/molecules24050983), 2019-03-11
Supplement: s1 [file s1]

## Investigation of 8-aza-7-deaza purine nucleoside derivatives

Hang Ren <sup>1,2</sup>, Haoyun An <sup>2,\*</sup> and Jingchao Tao <sup>1,\*</sup>

### Table of contents

|                                                                     |     |
|---------------------------------------------------------------------|-----|
| <sup>1</sup> H NMR spectra of product <b>1</b> and <b>2</b> .....   | S2  |
| <sup>1</sup> H NMR spectra of product <b>3</b> and <b>5</b> .....   | S3  |
| <sup>1</sup> H NMR spectra of product <b>7</b> and <b>8</b> .....   | S4  |
| <sup>1</sup> H NMR spectra of product <b>10</b> and <b>12</b> ..... | S5  |
| <sup>1</sup> H NMR spectra of product <b>13</b> and <b>14</b> ..... | S6  |
| <sup>1</sup> H NMR spectra of product <b>15</b> and <b>16</b> ..... | S7  |
| <sup>1</sup> H NMR spectra of product <b>17</b> and <b>18</b> ..... | S8  |
| <sup>1</sup> H NMR spectra of product <b>19</b> and <b>22</b> ..... | S9  |
| <sup>1</sup> H NMR spectra of product <b>23</b> and <b>27</b> ..... | S10 |
| <sup>13</sup> C NMR spectra of product <b>7</b> and <b>10</b> ..... | S11 |
| HRMS spectra of product <b>2</b> and <b>6</b> .....                 | S12 |
| HRMS spectra of product <b>12</b> and <b>13</b> .....               | S13 |
| HRMS spectra of product <b>14</b> and <b>15</b> .....               | S14 |
| HRMS spectra of product <b>16</b> .....                             | S15 |
| Crystal data and structure refinement for compound <b>7</b> .....   | S16 |
| Crystal data and structure refinement for compound <b>8</b> .....   | S17 |

HNMR DMSO

Chemical structure: CN1=NC(=C(NC1CO)CO)OC

Peak list (ppm): 7.906, 6.867, 5.982, 5.970, 5.320, 5.306, 5.062, 5.048, 4.757, 4.743, 4.728, 4.534, 4.521, 4.508, 4.495, 4.183, 4.170, 4.158, 4.145, 3.991, 3.977, 3.862, 3.848, 3.561, 3.545, 3.532, 3.442, 3.427, 3.412, 3.398.

Integration values: 1.00, 1.98, 1.00, 1.03, 1.03, 1.04, 1.11, 1.04, 1.03, 1.04, 1.24, 1.04.

**<sup>1</sup>H NMR DMSO**

Chemical structure: CN1C=NC2=C1N=CN2[C@@H]3O[C@H](CO)[C@@H](O)[C@H]3O

Chemical shifts (ppm): 8.535, 6.467, 5.756, 5.748, 4.320, 4.312, 4.309, 4.300, 4.168, 4.155, 4.142, 3.972, 3.711, 3.702, 3.681, 3.672, 3.561, 3.550, 3.531, 3.520, 3.171, 2.505.

Integration values: 1.01, 2.00, 1.03, 1.09, 1.09, 4.14, 1.08, 1.05, 1.08, 1.09.

**Product 3:  $^1\text{H}$  NMR (400 MHz,  $\text{DMSO}-d_6$ )**

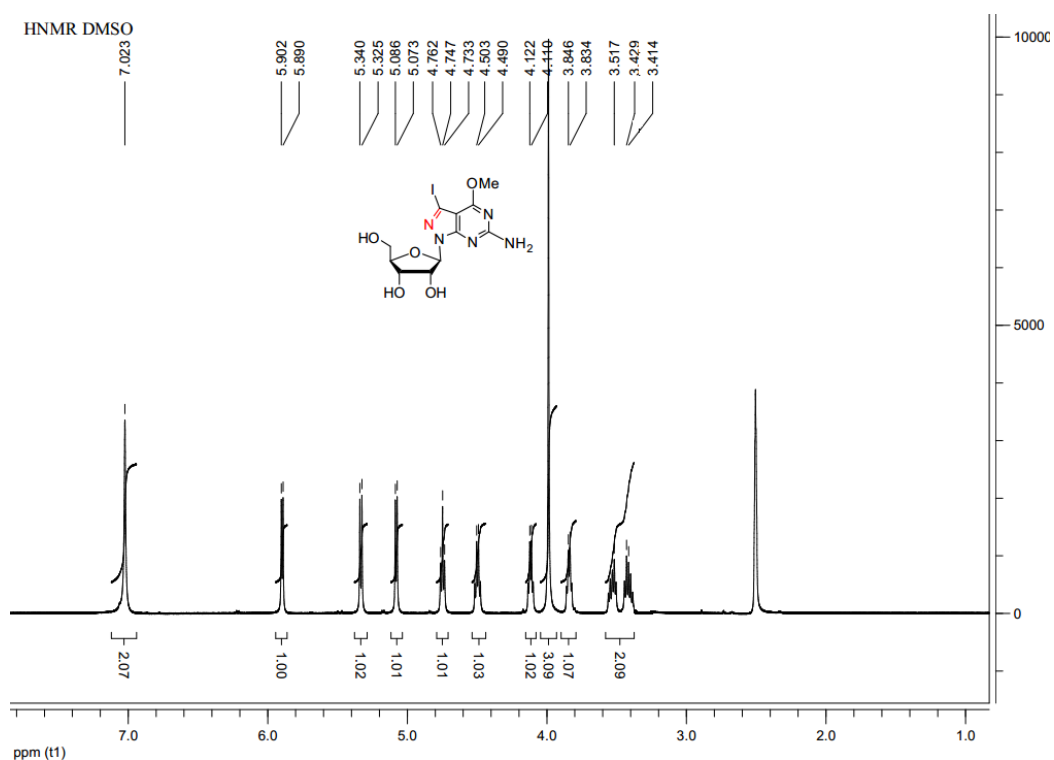

**Product 5:  $^1\text{H}$  NMR (400 MHz,  $\text{DMSO}-d_6$ )**

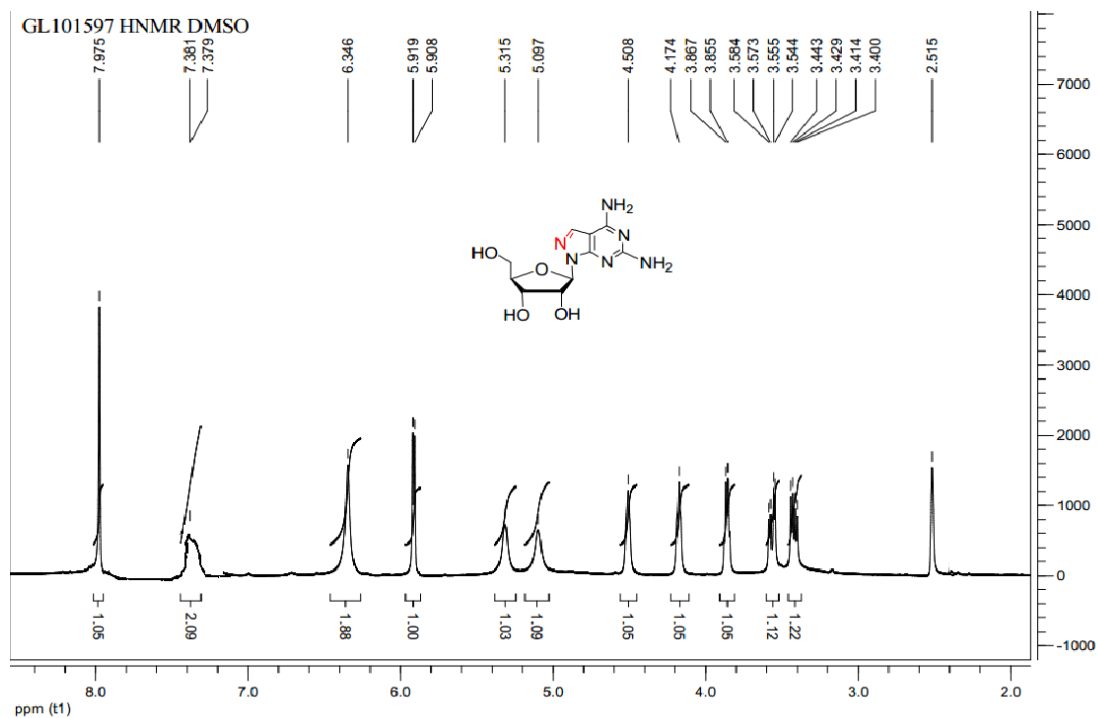

**Product 7:  $^1\text{H}$  NMR (400 MHz,  $\text{DMSO}-d_6$ )**

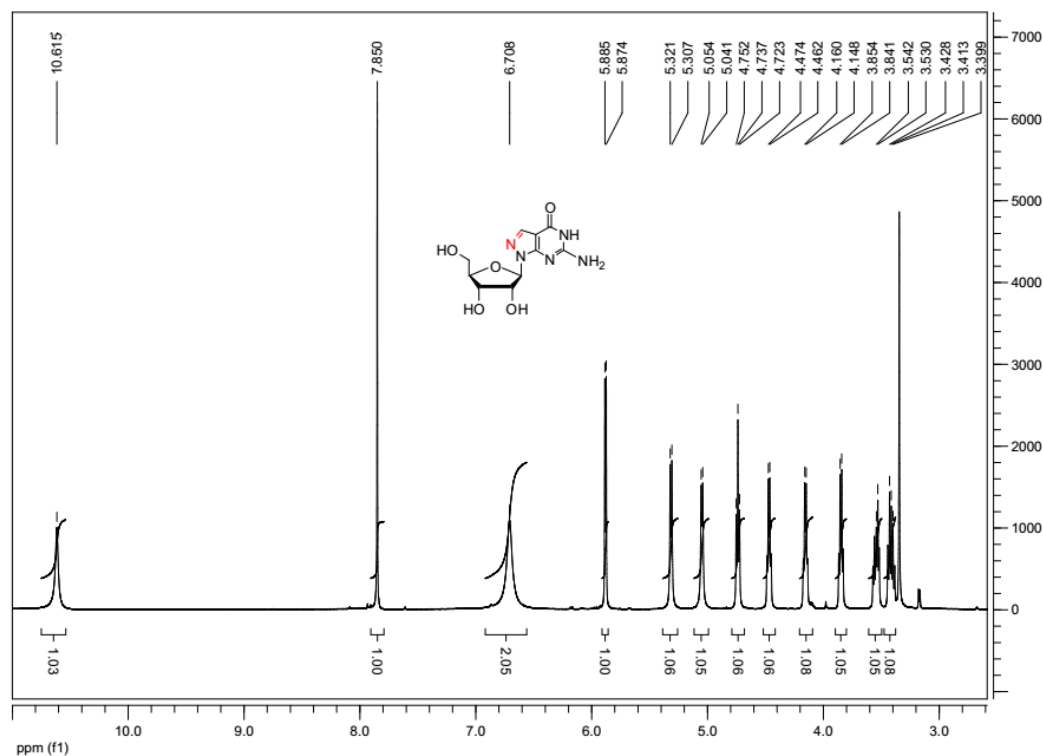

**Product 8:  $^1\text{H}$  NMR (400 MHz,  $\text{DMSO}-d_6$ )**

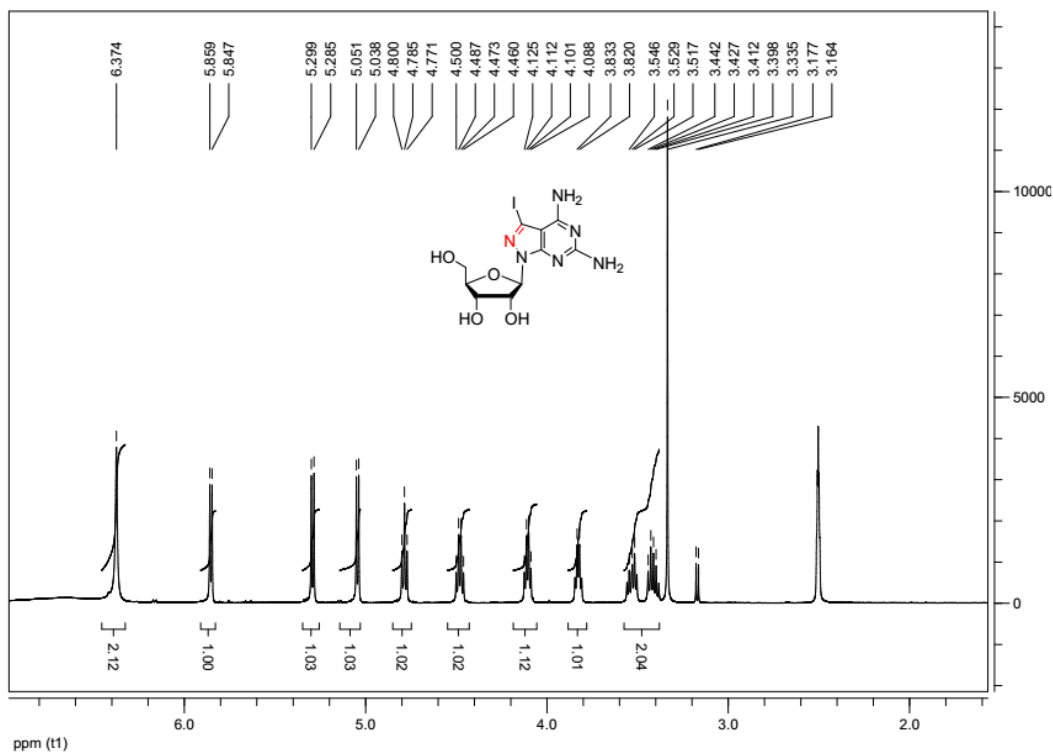

**Product 10:**  $^1\text{H}$  NMR (400 MHz,  $\text{DMSO}-d_6$ )

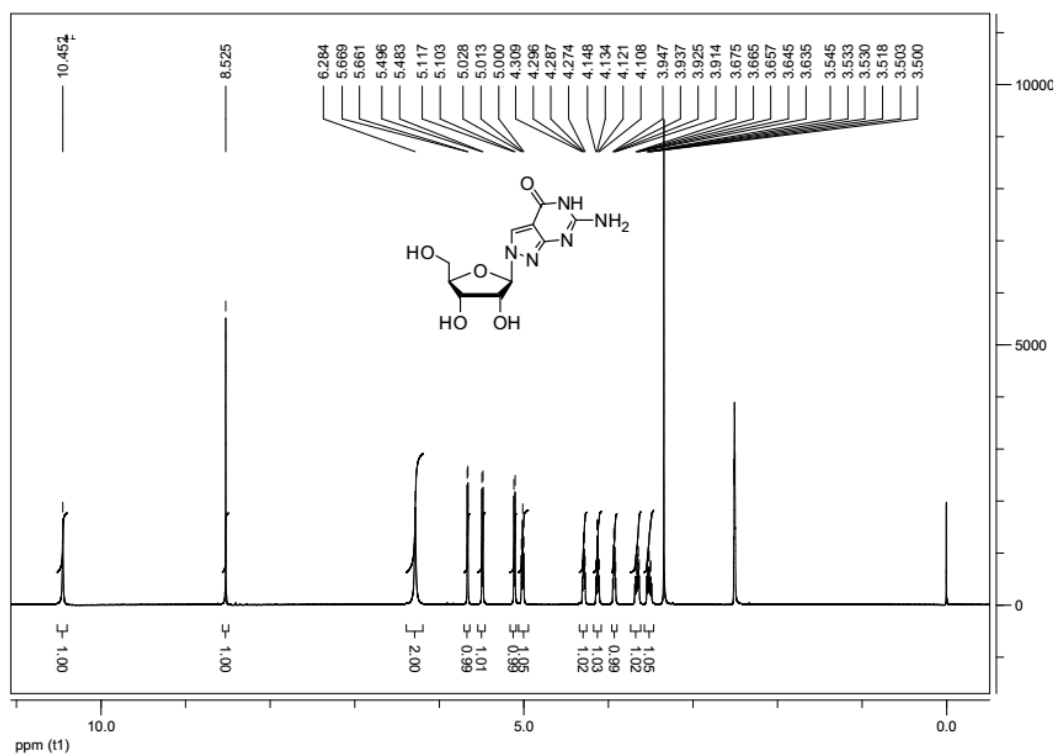

**Product 12:**  $^1\text{H}$  NMR (400 MHz,  $\text{DMSO}-d_6$ )

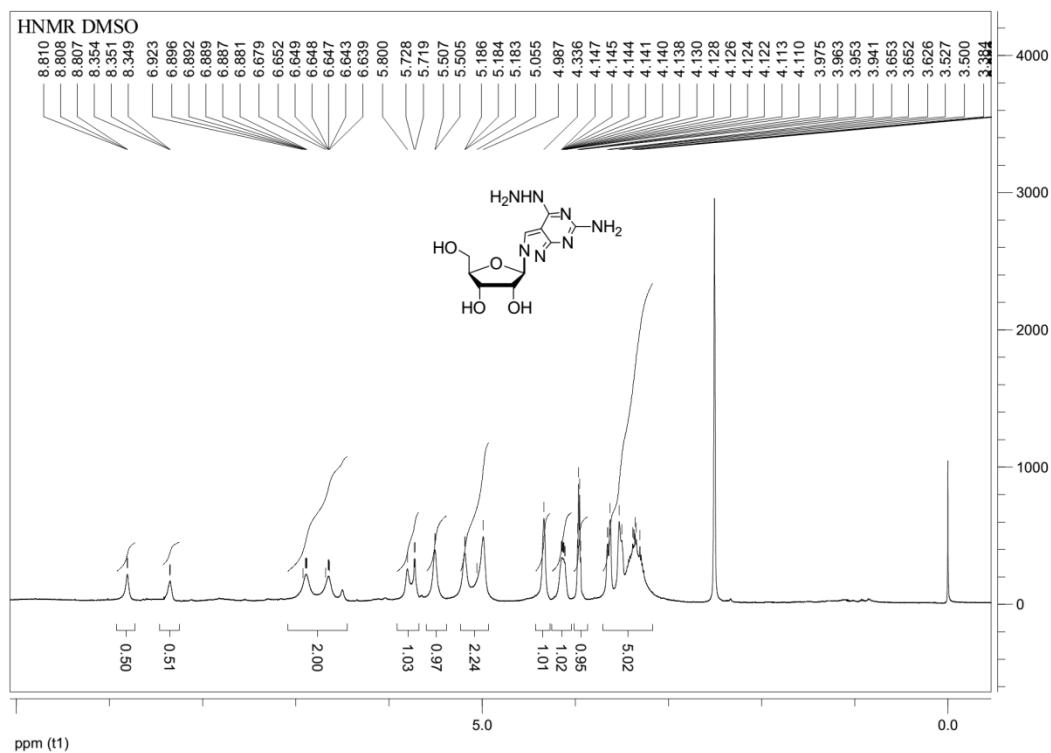

**Product 13:  $^1\text{H}$  NMR (400 MHz,  $\text{DMSO}-d_6$ )**

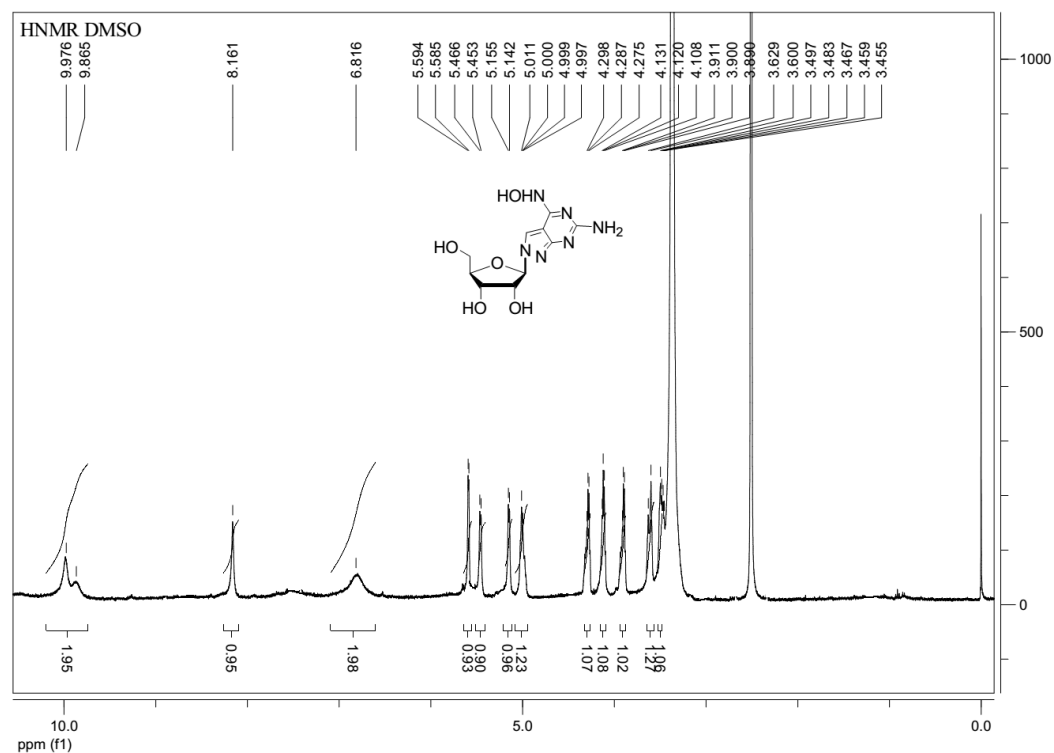

**Product 14:  $^1\text{H}$  NMR (400 MHz,  $\text{DMSO}-d_6$ )**

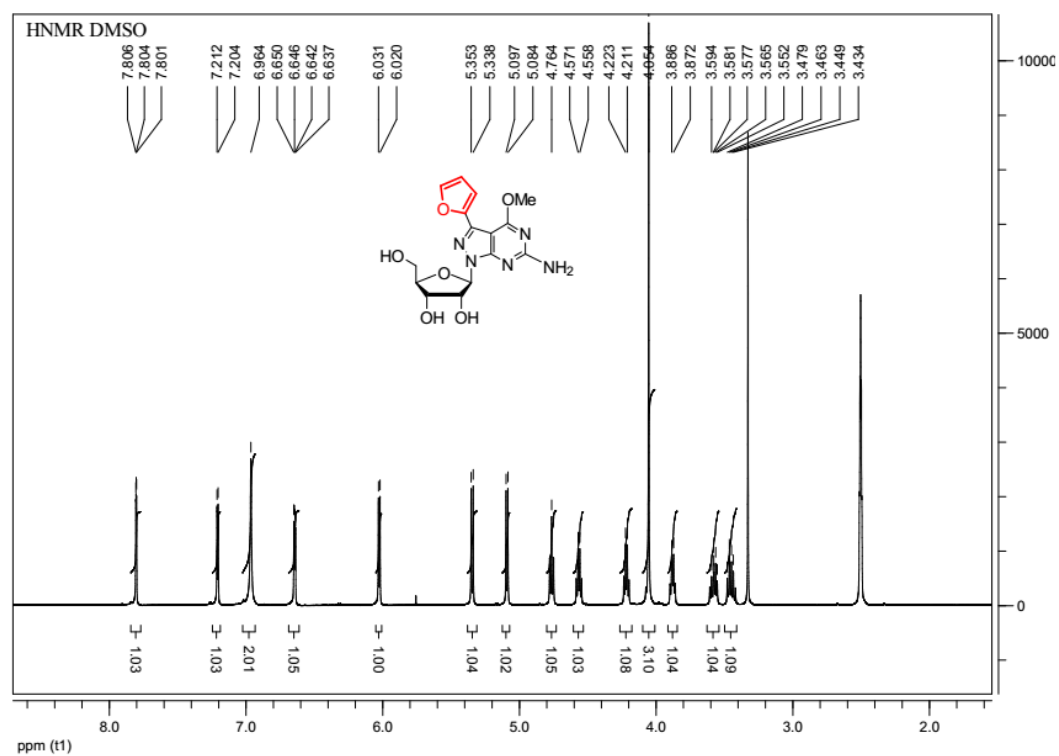

**Product 15:  $^1\text{H}$  NMR (400 MHz,  $\text{DMSO}-d_6$ )**

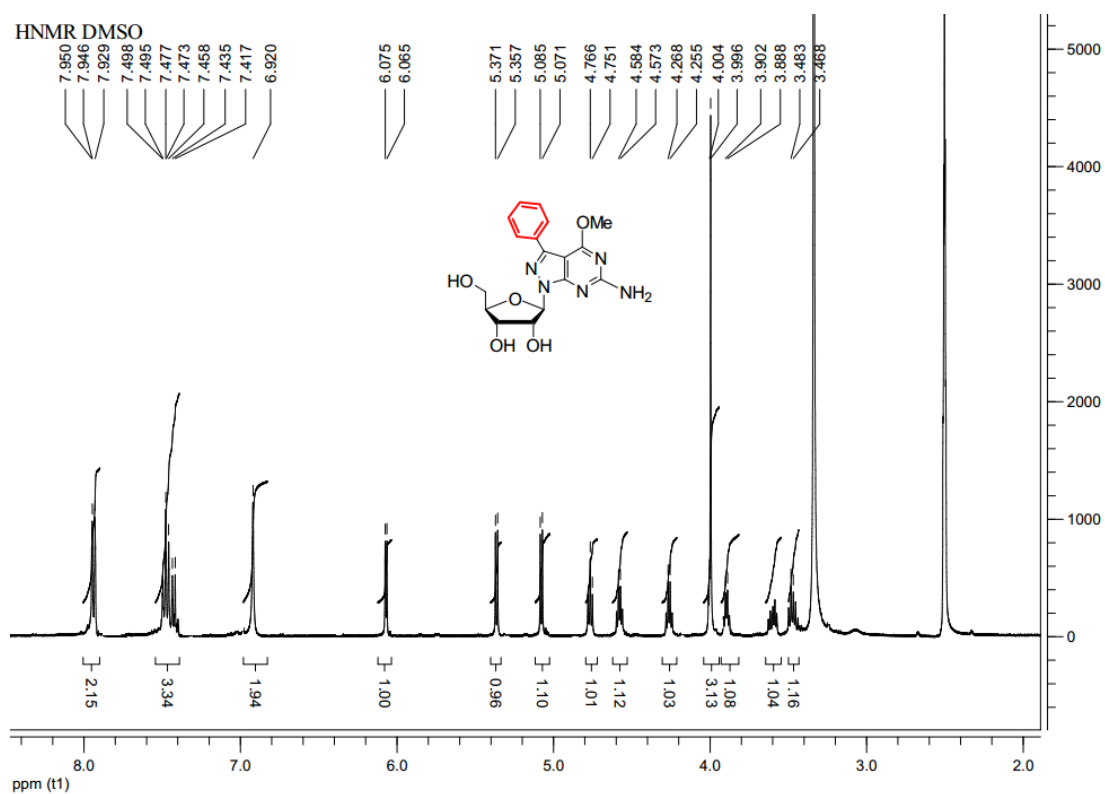

**Product 16:  $^1\text{H}$  NMR (400 MHz,  $\text{DMSO}-d_6$ )**

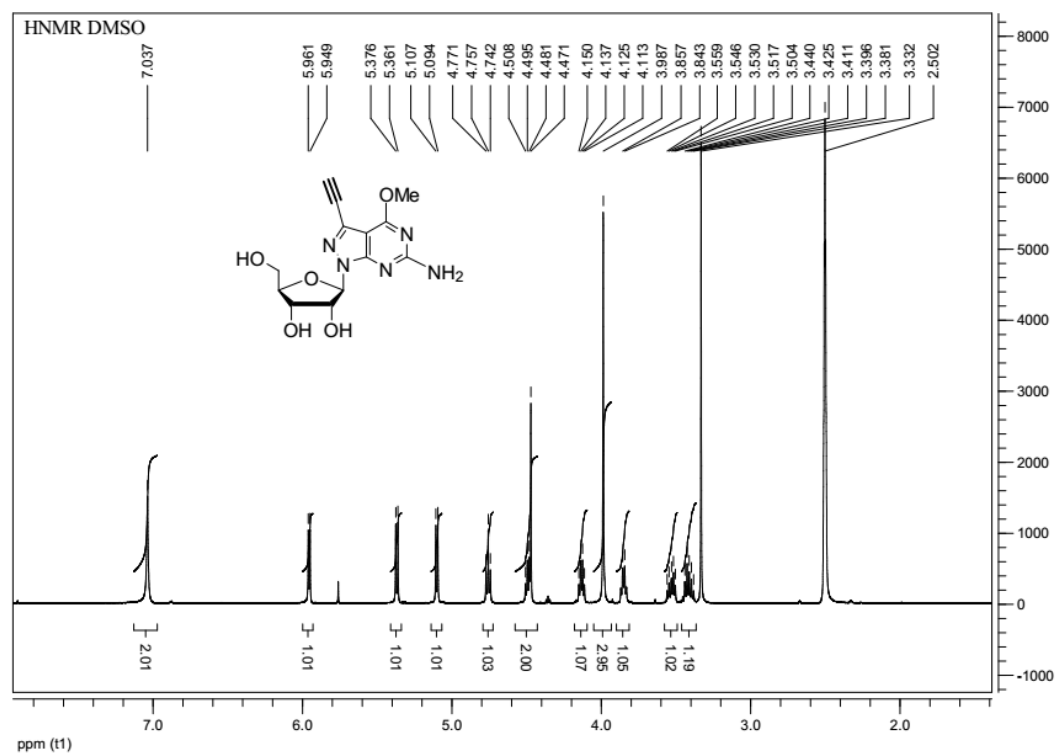

**Product 17:  $^1\text{H}$  NMR (400 MHz,  $\text{DMSO}-d_6$ )**

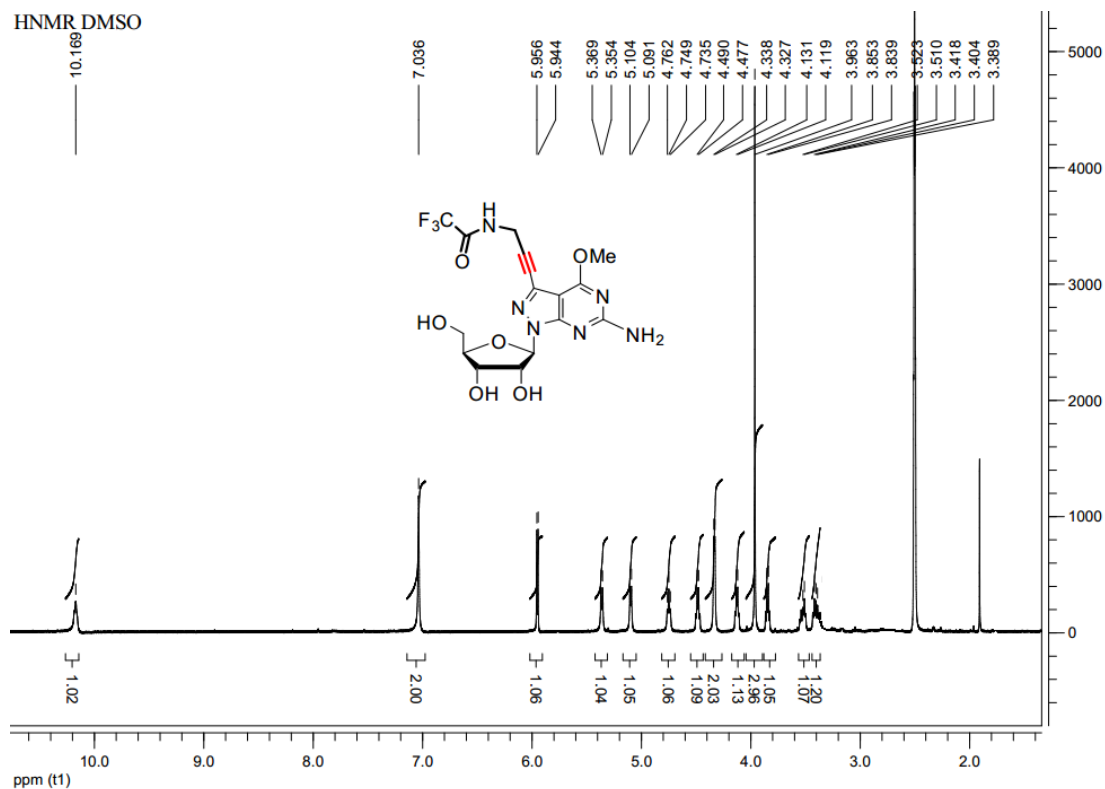

**Product 18:  $^1\text{H}$  NMR (400 MHz,  $\text{DMSO}-d_6$ )**

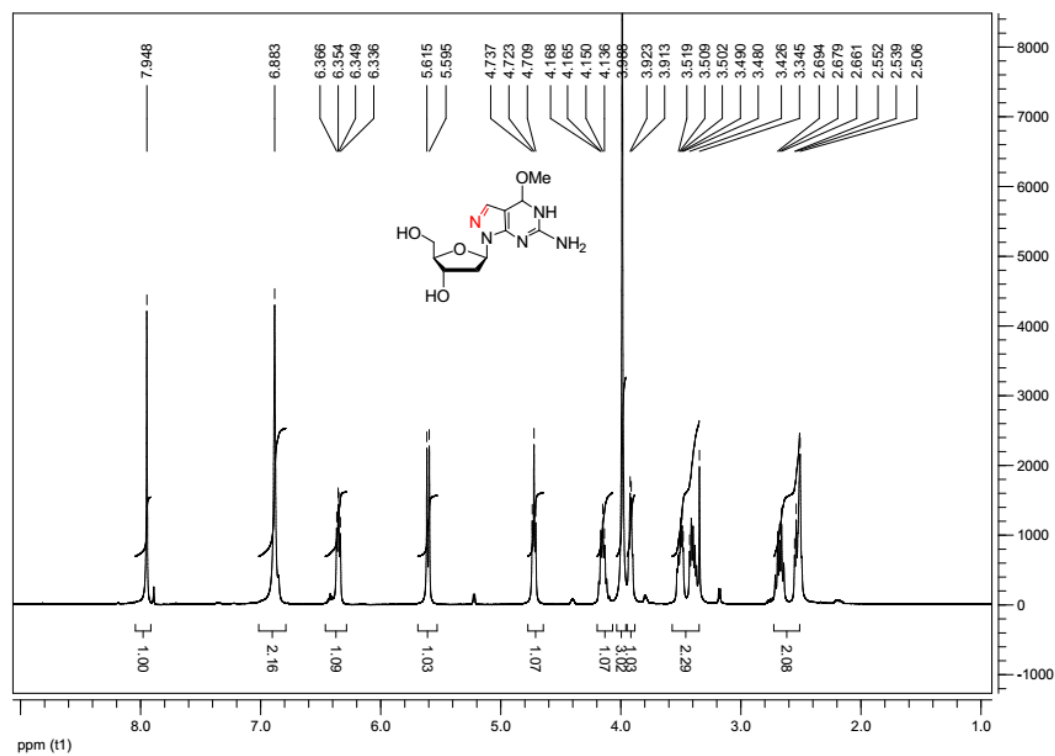



**Product 19:**  $^1\text{H}$  NMR (400 MHz,  $\text{DMSO}-d_6$ )

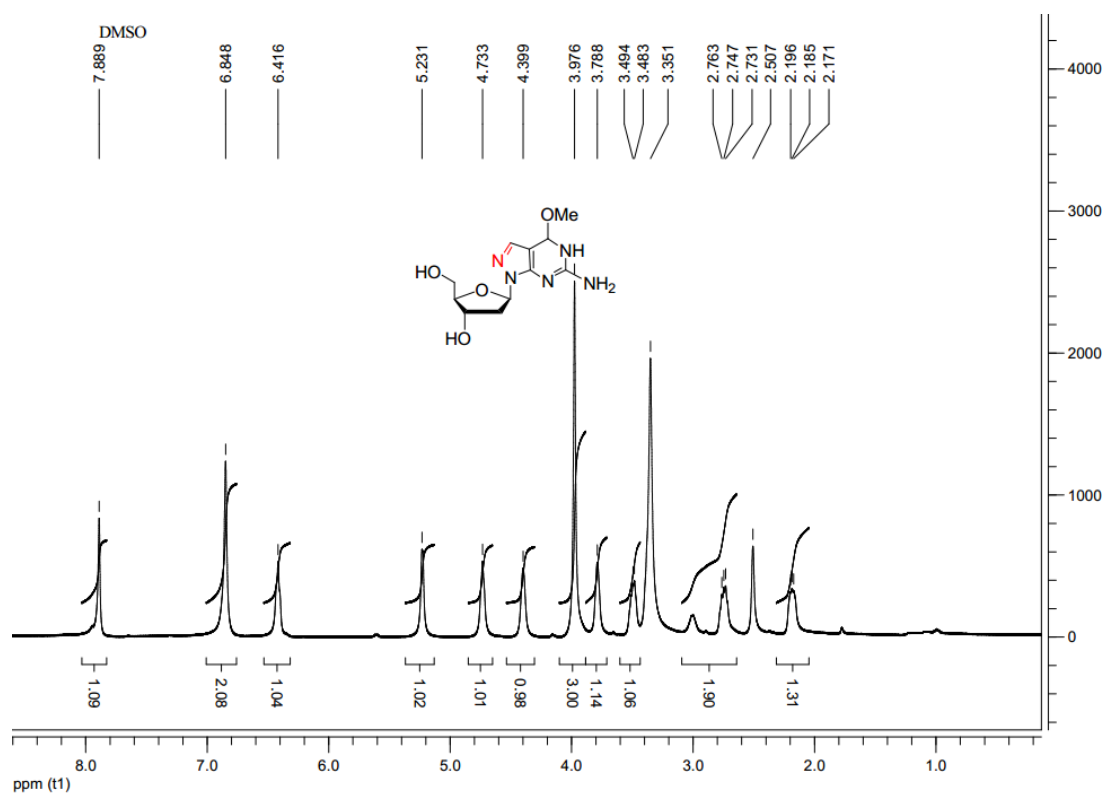

**Product 22:**  $^1\text{H}$  NMR (400 MHz,  $\text{DMSO}-d_6$ )

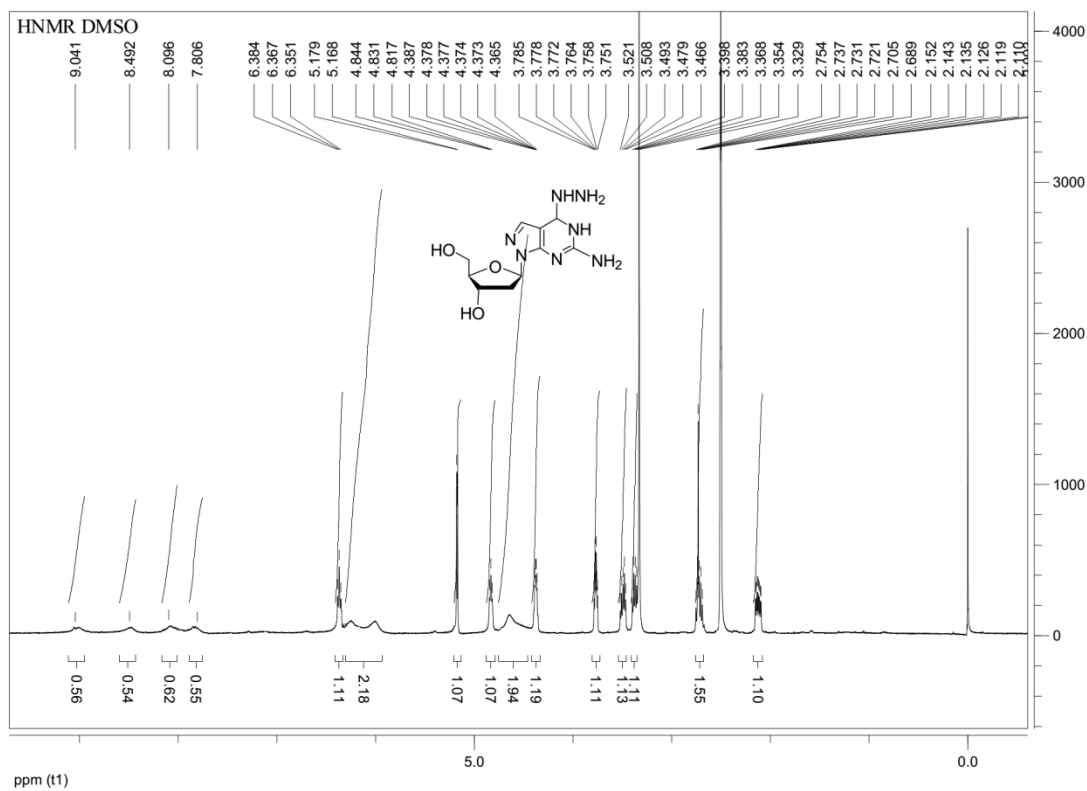

**Product 23:**  $^1\text{H}$  NMR (400 MHz,  $\text{DMSO}-d_6$ )

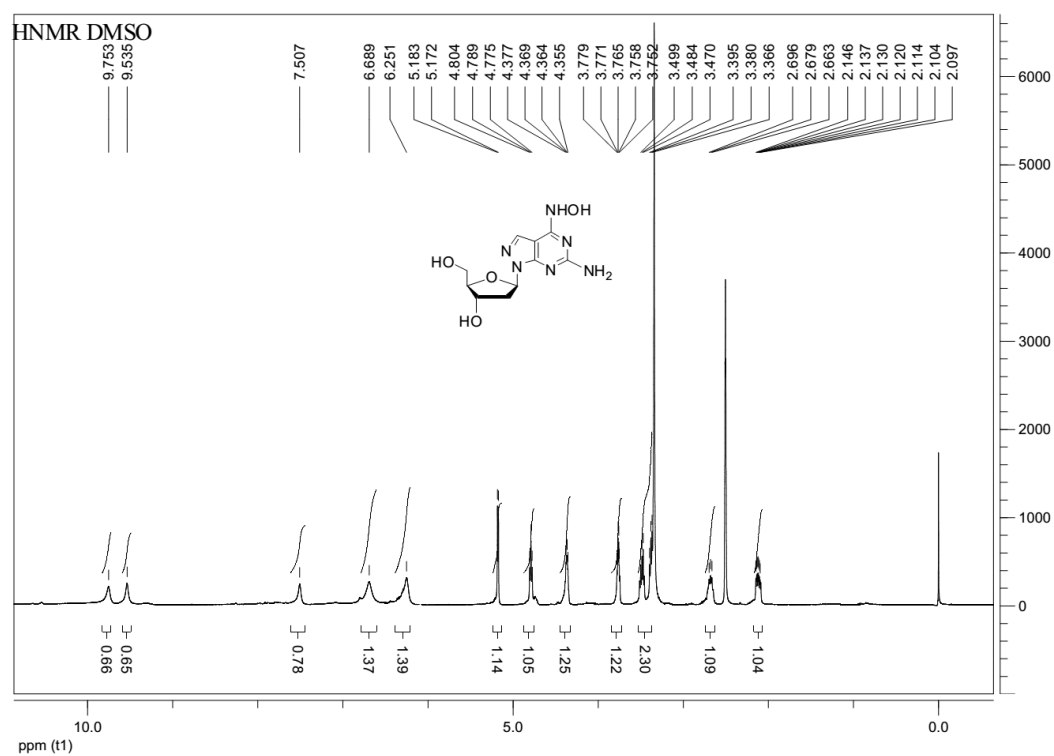

**Product 27:**  $^1\text{H}$  NMR (400 MHz,  $\text{DMSO}-d_6$ )

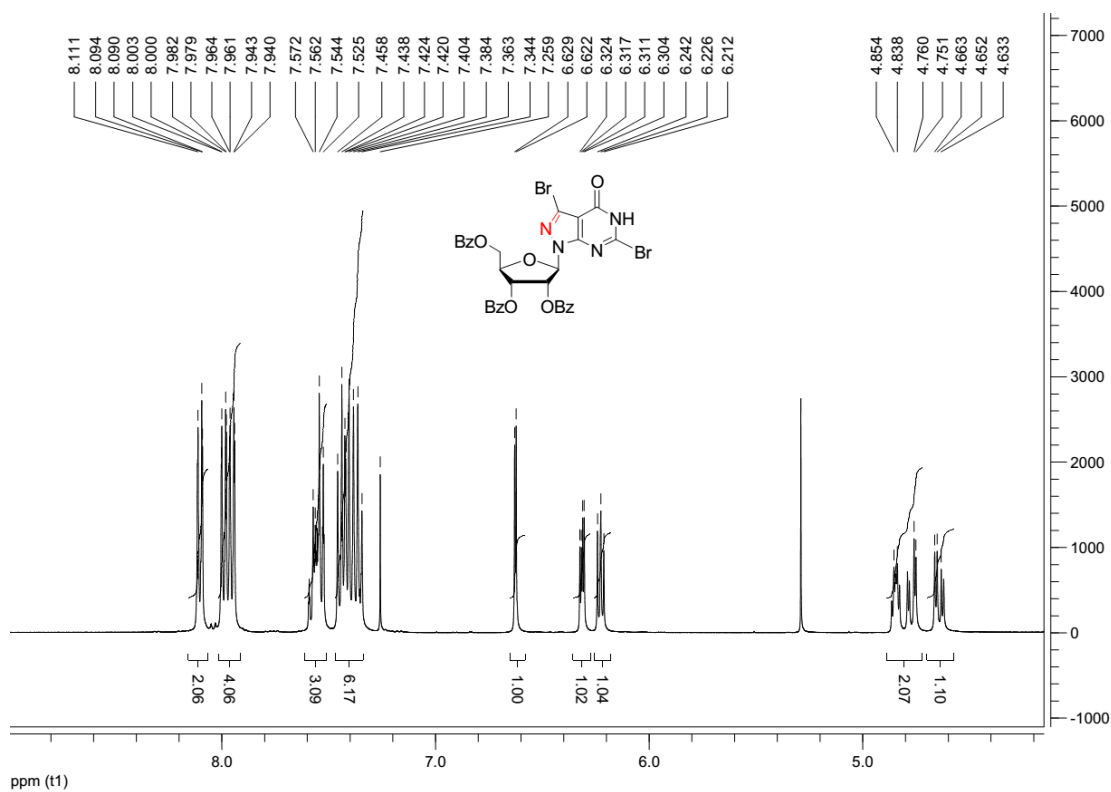

**Product 7:**  $^{13}\text{C}$  NMR (400 MHz,  $\text{DMSO}-d_6$ )

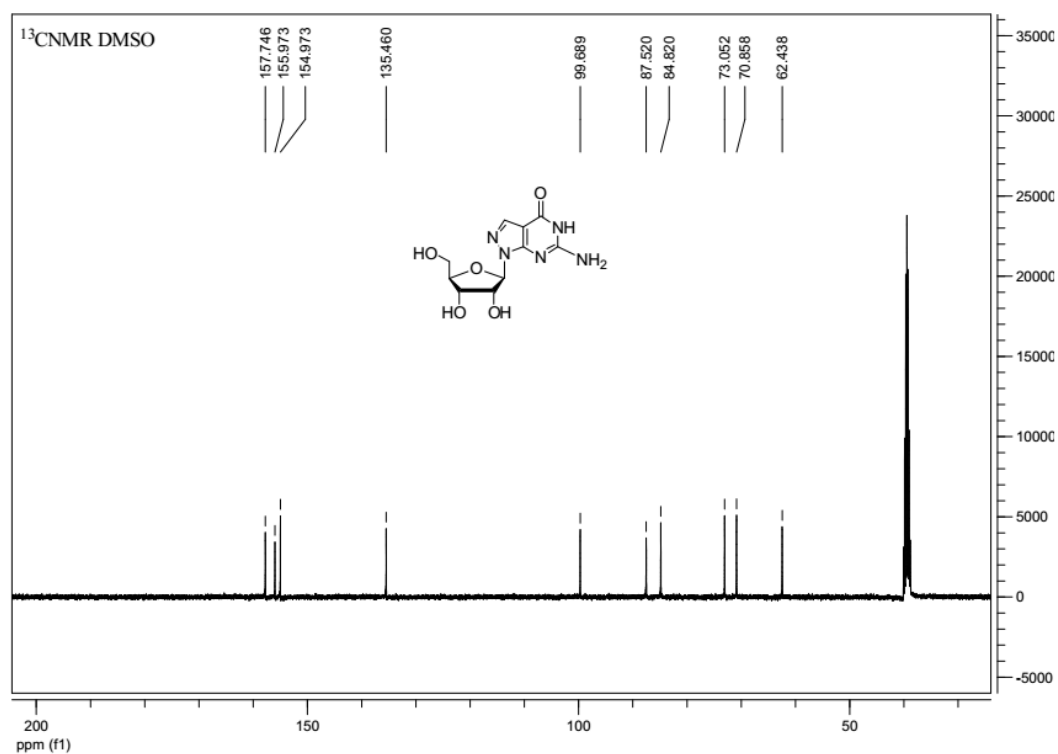

**Product 10:**  $^{13}\text{C}$  NMR (400 MHz,  $\text{DMSO}-d_6$ )

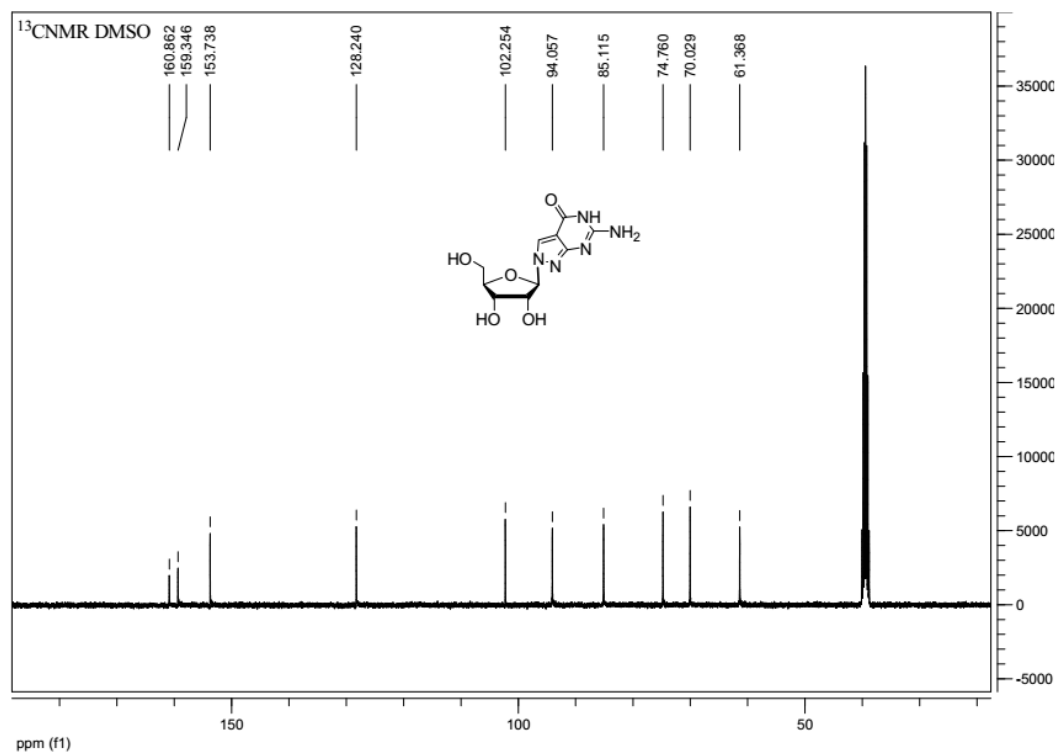

## Product 2: HRMS spectra

2

TJC-11 1 (0.017) AM (Cen,4, 80.00, Ht,5000.0,0.00,1.00); Sm (Mn, 2x3.00); Cm (1:14)

TOF MS ES+  
750

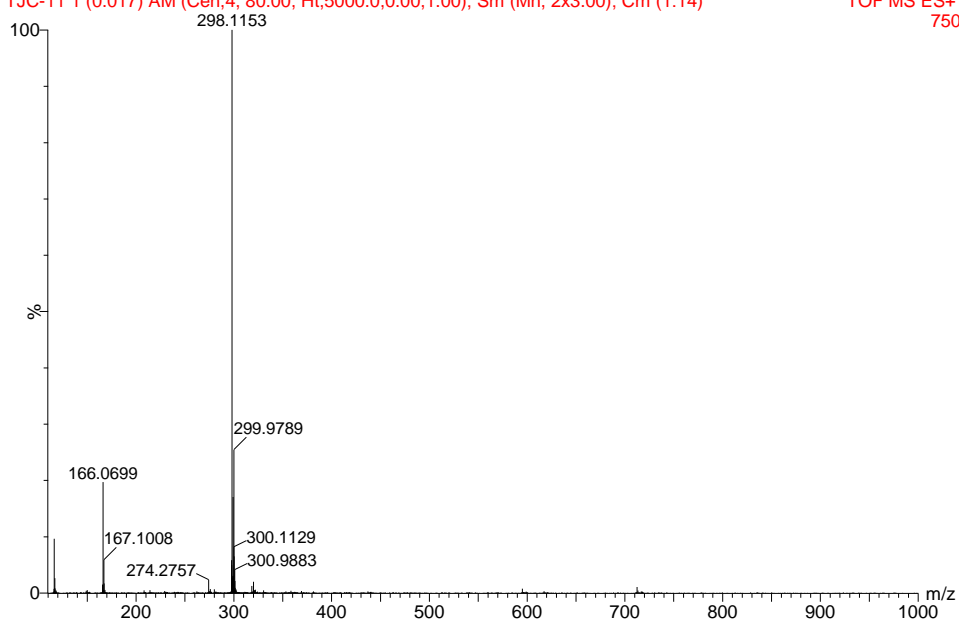

## Product 6: HRMS spectra

TJC-12 10 (0.173) AM (Cen,4, 80.00, Ht,5000.0,0.00,1.00); Sm (Mn, 2x3.00); Cm (1:14)

TOF MS ES+  
790

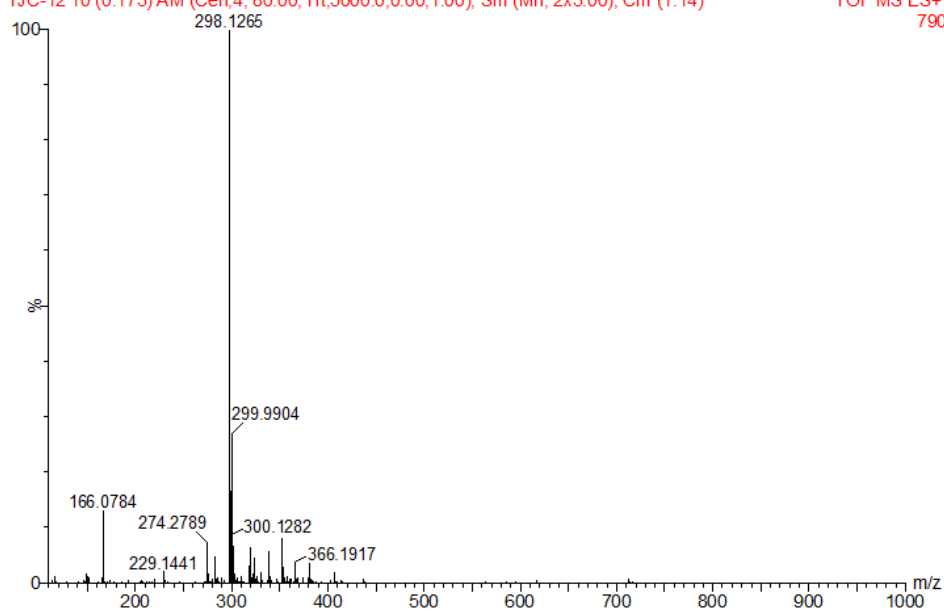

## Product 12: HRMS spectra

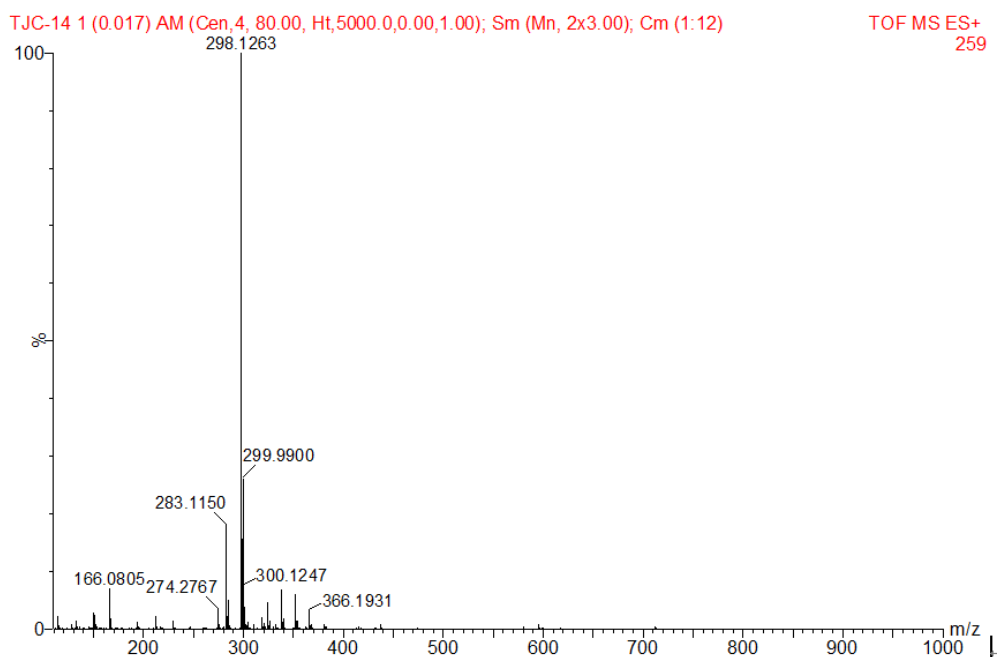

## Product 13: HRMS spectra

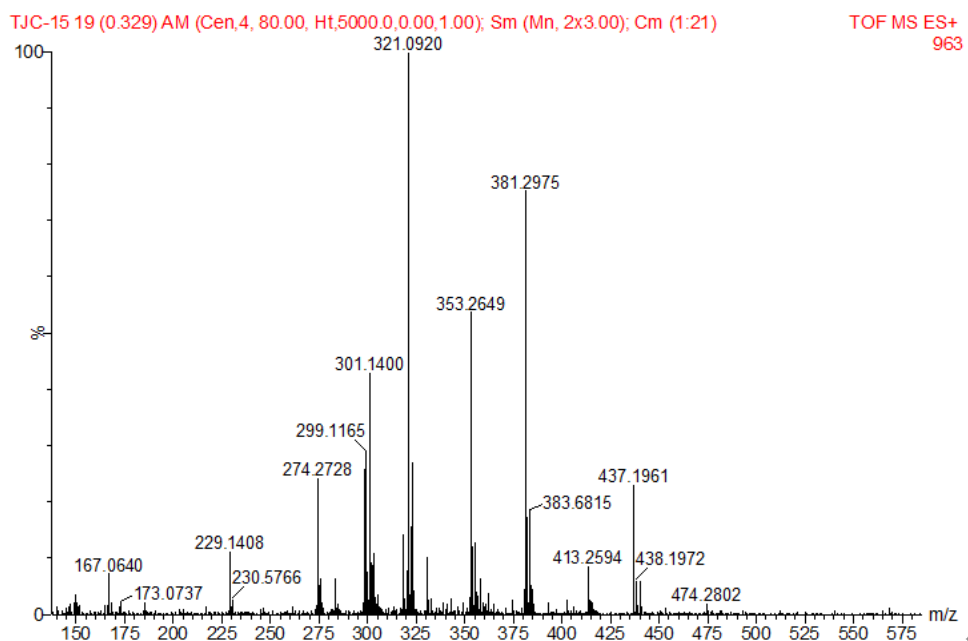

## Product 14: HRMS spectra

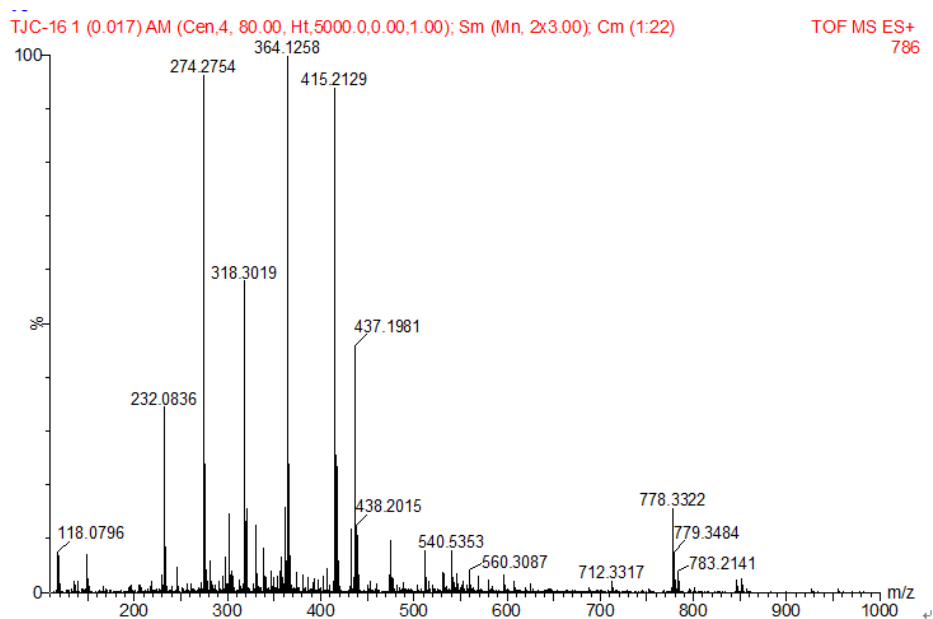

## Product 15: HRMS spectra

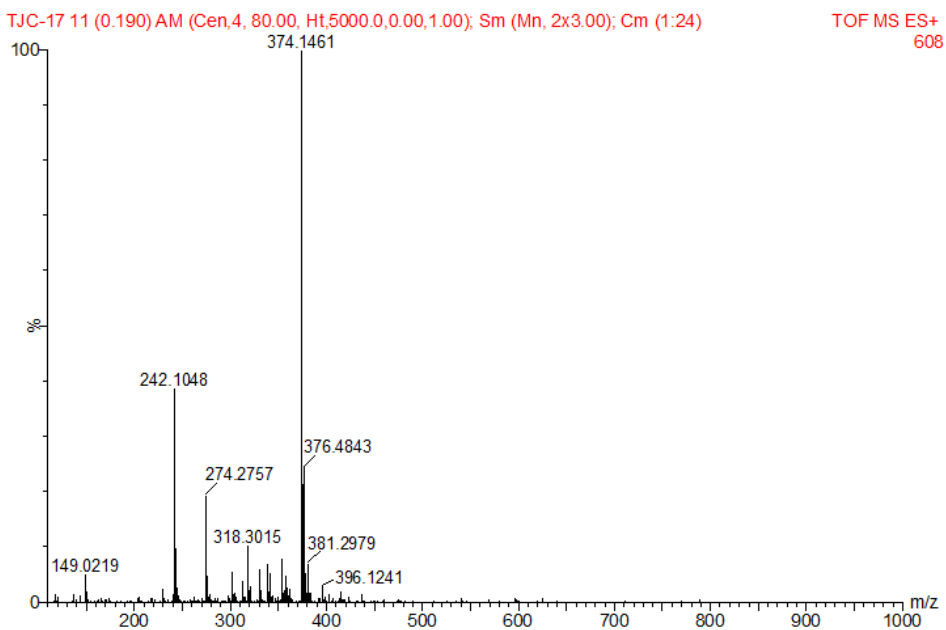

## Product 16: HRMS spectra

TJC-18 16 (0.276) AM (Cen.4, 80.00, Ht.5000.0,0.00,1.00); Sm (Mn, 2x3.00); Cm (1:23)

TOF MS ES+  
319

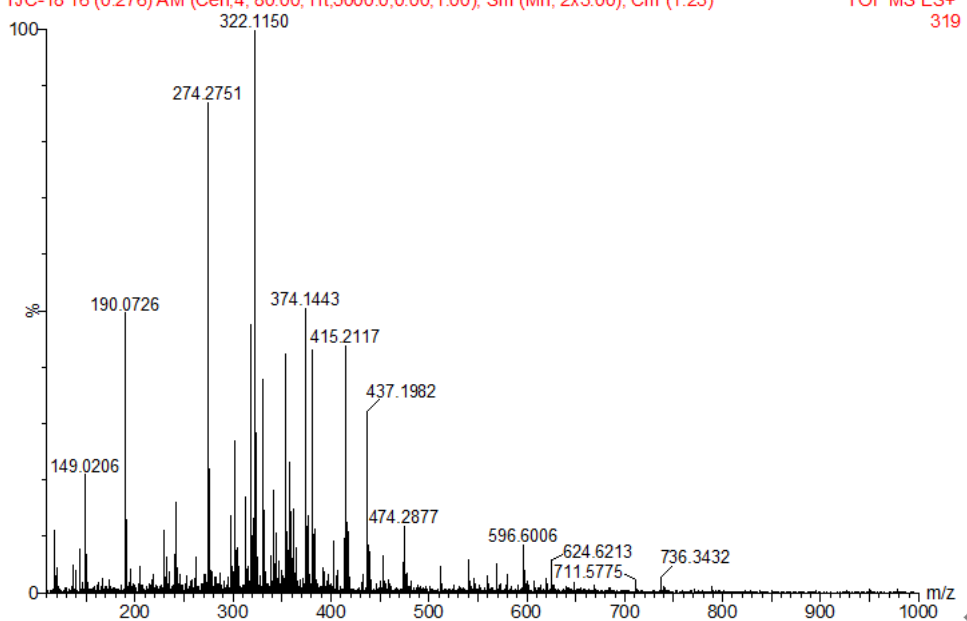

---

## Crystal data and structure refinement for compound 7

---

|                                             |                                                                |
|---------------------------------------------|----------------------------------------------------------------|
| Identification code                         | 201804211                                                      |
| Empirical formula                           | C <sub>10</sub> H <sub>13</sub> N <sub>5</sub> O <sub>5</sub>  |
| Formula weight                              | 283.25                                                         |
| Temperature/K                               | 293(2)                                                         |
| Crystal system                              | orthorhombic                                                   |
| Space group                                 | P2 <sub>1</sub> 2 <sub>1</sub> 2 <sub>1</sub>                  |
| a/Å                                         | 4.7669(2)                                                      |
| b/Å                                         | 11.0409(5)                                                     |
| c/Å                                         | 21.6334(9)                                                     |
| $\alpha$ /°                                 | 90                                                             |
| $\beta$ /°                                  | 90                                                             |
| $\gamma$ /°                                 | 90                                                             |
| Volume/Å <sup>3</sup>                       | 1138.59(8)                                                     |
| Z                                           | 4                                                              |
| $\rho_{\text{calc}}/\text{cm}^3$            | 1.652                                                          |
| $\mu/\text{mm}^{-1}$                        | 1.157                                                          |
| F(000)                                      | 592.0                                                          |
| Crystal size/mm <sup>3</sup>                | 0.15 × 0.11 × 0.1                                              |
| Radiation                                   | CuK $\alpha$ ( $\lambda$ = 1.54184)                            |
| 2 $\Theta$ range for data collection/°      | 8.174 to 134.138                                               |
| Index ranges                                | -3 ≤ h ≤ 5, -13 ≤ k ≤ 13, -25 ≤ l ≤ 25                         |
| Reflections collected                       | 4100                                                           |
| Independent reflections                     | 2032 [ $R_{\text{int}}$ = 0.0304, $R_{\text{sigma}}$ = 0.0405] |
| Data/restraints/parameters                  | 2032/0/184                                                     |
| Goodness-of-fit on F <sup>2</sup>           | 1.036                                                          |
| Final R indexes [ $I \geq 2\sigma(I)$ ]     | $R_1$ = 0.0366, $wR_2$ = 0.0880                                |
| Final R indexes [all data]                  | $R_1$ = 0.0408, $wR_2$ = 0.0924                                |
| Largest diff. peak/hole / e Å <sup>-3</sup> | 0.14/-0.21                                                     |
| Flack parameter                             | 0.2(2)                                                         |

---



---

## Crystal data and structure refinement for compound 8

---

|                                             |                                                                |
|---------------------------------------------|----------------------------------------------------------------|
| Identification code                         | 201804210                                                      |
| Empirical formula                           | C <sub>10</sub> H <sub>15</sub> IN <sub>6</sub> O <sub>5</sub> |
| Formula weight                              | 426.18                                                         |
| Temperature/K                               | 293(2)                                                         |
| Crystal system                              | monoclinic                                                     |
| Space group                                 | P2 <sub>1</sub>                                                |
| a/Å                                         | 5.08845(13)                                                    |
| b/Å                                         | 12.7514(2)                                                     |
| c/Å                                         | 11.3200(2)                                                     |
| α/°                                         | 90                                                             |
| β/°                                         | 91.4146(19)                                                    |
| γ/°                                         | 90                                                             |
| Volume/Å <sup>3</sup>                       | 734.28(3)                                                      |
| Z                                           | 2                                                              |
| ρ <sub>calc</sub> /cm <sup>3</sup>          | 1.928                                                          |
| μ/mm <sup>-1</sup>                          | 17.478                                                         |
| F(000)                                      | 420.0                                                          |
| Crystal size/mm <sup>3</sup>                | 0.15 × 0.13 × 0.11                                             |
| Radiation                                   | CuKα (λ = 1.54184)                                             |
| 2θ range for data collection/°              | 7.812 to 134.094                                               |
| Index ranges                                | -3 ≤ h ≤ 6, -15 ≤ k ≤ 15, -13 ≤ l ≤ 12                         |
| Reflections collected                       | 5309                                                           |
| Independent reflections                     | 2616 [R <sub>int</sub> = 0.0300, R <sub>sigma</sub> = 0.0391]  |
| Data/restraints/parameters                  | 2616/3/213                                                     |
| Goodness-of-fit on F <sup>2</sup>           | 1.062                                                          |
| Final R indexes [I ≥ 2σ (I)]                | R <sub>1</sub> = 0.0286, wR <sub>2</sub> = 0.0701              |
| Final R indexes [all data]                  | R <sub>1</sub> = 0.0296, wR <sub>2</sub> = 0.0711              |
| Largest diff. peak/hole / e Å <sup>-3</sup> | 0.56/-0.62                                                     |
| Flack parameter                             | -0.021(5)                                                      |

---
